# Supplementary material for: Condition-Specific Competitive Effects of the Invasive Mosquito <em>Aedes albopictus</em> on the Resident <em>Culex pipiens</em> Among Different Urban Container Habitats May Explain Their Coexistence in the Field
Source: Preprints.org preprint supplement (doi:10.20944/preprints202110.0014.v1), 2021-10-01
Supplement: Supplementary file 1 [file supplementary]

## Sheet: Field survey
Season	Container type	Sample Total	C. pipiens	A. albopictus	Sample density
early	Bucket	17	17	0	0.113333
early	Bucket	15	0	15	0.0967742
early	Bucket	22	22	0	0.0814815
early	Bucket	5	0	5	0.025
early	Bucket	6	6	0	0.012
early	Dumped tire	27	27	0	2.25
early	Dumped tire	99	93	0	0.66
early	Dumped tire	82	57	5	0.41
early	Dumped tire	50	49	0	0.4
early	Dumped tire	119	119	0	0.396667
early	Dumped tire	94	94	0	0.376
early	Dumped tire	16	16	0	0.355556
early	Dumped tire	30	30	0	0.3
early	Dumped tire	30	28	0	0.3
early	Dumped tire	63	63	0	0.286364
early	Dumped tire	52	52	0	0.26
early	Dumped tire	51	51	0	0.255
early	Dumped tire	61	61	0	0.244
early	Dumped tire	66	66	0	0.24
early	Dumped tire	35	27	4	0.233333
early	Dumped tire	63	60	3	0.229091
early	Dumped tire	29	29	0	0.193333
early	Dumped tire	38	38	0	0.180952
early	Dumped tire	21	21	0	0.14
early	Dumped tire	20	0	17	0.133333
early	Dumped tire	31	31	0	0.103333
early	Dumped tire	26	26	0	0.0866667
early	Dumped tire	23	23	0	0.0836364
early	Dumped tire	14	7	7	0.0777778
early	Dumped tire	19	19	0	0.076
early	Dumped tire	11	2	9	0.0733333
early	Dumped tire	12	12	0	0.06
early	Dumped tire	4	0	4	0.0588235
early	Dumped tire	11	8	0	0.055
early	Dumped tire	7	7	0	0.05
early	Dumped tire	9	2	6	0.045
early	Dumped tire	6	3	2	0.04
early	Dumped tire	7	7	0	0.0233333
early	Dumped tire	2	2	0	0.016
early	Dumped tire	3	3	0	0.0133333
early	Dumped tire	3	3	0	0.01
early	Dumped tire	0	0	0	0
early	Dumped tire	0	0	0	0
early	Dumped tire	0	0	0	0
early	Dumped tire	0	0	0	0
early	Dumped tire	0	0	0	0
early	Dumped tire	0	0	0	0
early	Dumped tire	0	0	0	0
early	Dumped tire	0	0	0	0
early	Dumped tire	0	0	0	0
early	Dumped tire	0	0	0	0
early	Fence pole	79	78	0	0.79
early	Fence pole	13	1	12	0.13
early	Fence pole	3	0	3	0.0517241
early	Fence pole	8	6	2	0.0355556
early	Fence pole	2	1	1	0.025
early	Fence pole	1	1	0	0.00666667
early	Fence pole	1	0	1	0.005
early	Fence pole	0	0	0	0
early	Fence pole	0	0	0	0
early	Fence pole	0	0	0	0
early	Fence pole	0	0	0	0
early	Discarded plastic	69	69	0	0.811765
early	Discarded plastic	68	68	0	0.453333
early	Discarded plastic	30	28	2	0.3
early	Discarded plastic	62	62	0	0.269565
early	Discarded plastic	57	57	0	0.228
early	Discarded plastic	54	54	0	0.192857
early	Discarded plastic	50	50	0	0.178571
early	Discarded plastic	15	15	0	0.157895
early	Discarded plastic	43	38	5	0.156364
early	Discarded plastic	35	35	0	0.116667
early	Discarded plastic	22	21	1	0.11
early	Discarded plastic	20	20	0	0.1
early	Discarded plastic	18	0	18	0.0837209
early	Discarded plastic	12	10	0	0.08
early	Discarded plastic	33	33	0	0.0776471
early	Discarded plastic	13	12	1	0.0722222
early	Discarded plastic	20	19	0	0.0666667
early	Discarded plastic	19	19	0	0.0633333
early	Discarded plastic	12	12	0	0.06
early	Discarded plastic	25	25	0	0.0555556
early	Discarded plastic	15	15	0	0.05
early	Discarded plastic	3	3	0	0.02
early	Discarded plastic	2	2	0	0.008
early	Discarded plastic	0	0	0	0
early	Discarded plastic	0	0	0	0
early	Discarded plastic	0	0	0	0
early	Discarded plastic	0	0	0	0
early	Discarded plastic	0	0	0	0
early	Discarded plastic	0	0	0	0
early	Discarded plastic	0	0	0	0
early	Discarded plastic	0	0	0	0
early	Discarded plastic	0	0	0	0
early	Discarded styrofoam	59	59	0	0.786667
early	Discarded styrofoam	66	58	0	0.33
early	Discarded styrofoam	0	0	0	0
early	Discarded styrofoam	0	0	0	0
early	Discarded styrofoam	0	0	0	0
early	Discarded styrofoam	0	0	0	0
early	Discarded styrofoam	0	0	0	0
early	Trash can	168	120	0	0.672
early	Trash can	104	104	0	0.52
early	Trash can	47	47	0	0.47
early	Trash can	13	5	8	0.464286
early	Trash can	53	53	0	0.46087
early	Trash can	71	71	0	0.394444
early	Trash can	46	46	0	0.306667
early	Trash can	53	53	0	0.265
early	Trash can	35	35	0	0.194444
early	Trash can	11	11	0	0.1
early	Trash can	17	17	0	0.0944444
early	Trash can	5	5	0	0.02
early	Trash can	1	0	1	0.0125
early	Trash can	1	0	0	0.00333333
late	Bucket	20	20	0	0.689655
late	Bucket	26	0	26	0.305882
late	Bucket	7	1	2	0.269231
late	Bucket	20	1	18	0.266667
late	Bucket	16	0	5	0.266667
late	Bucket	14	5	9	0.152174
late	Bucket	11	1	10	0.11
late	Bucket	8	0	4	0.102564
late	Bucket	8	4	1	0.0963855
late	Bucket	12	0	12	0.0745342
late	Bucket	6	6	0	0.05
late	Fence pole	27	0	27	0.75
late	Fence pole	15	0	15	0.576923
late	Fence pole	15	0	15	0.535714
late	Fence pole	9	0	9	0.375
late	Fence pole	12	0	11	0.352941
late	Fence pole	39	0	39	0.293233
late	Fence pole	25	0	25	0.208333
late	Fence pole	6	0	6	0.142857
late	Fence pole	7	0	7	0.122807
late	Fence pole	2	0	2	0.105263
late	Fence pole	7	0	7	0.0909091
late	Fence pole	8	0	8	0.0888889
late	Fence pole	7	0	7	0.0707071
late	Fence pole	6	0	6	0.0666667
late	Fence pole	2	0	2	0.0666667
late	Fence pole	3	0	3	0.0428571
late	Fence pole	3	0	3	0.0428571
late	Fence pole	3	0	3	0.0340909
late	Fence pole	2	0	2	0.0333333
late	Fence pole	2	0	2	0.030303
late	Fence pole	2	0	2	0.0289855
late	Fence pole	7	0	7	0.0273438
late	Fence pole	2	0	2	0.025974
late	Fence pole	1	1	0	0.0181818
late	Fence pole	1	0	1	0.0121951
late	Fence pole	1	0	1	0.0114943
late	Fence pole	1	0	1	0.00512821
late	Plastic trash	47	0	47	0.47
late	Plastic trash	11	0	11	0.44
late	Plastic trash	24	0	24	0.369231
late	Plastic trash	55	45	7	0.300546
late	Plastic trash	10	0	10	0.2
late	Plastic trash	4	0	4	0.16
late	Plastic trash	10	3	7	0.15873
late	Plastic trash	20	1	18	0.1
late	Plastic trash	6	4	2	0.0705882
late	Plastic trash	5	0	5	0.0666667
late	Plastic trash	0	0	0	0
late	Dumped tire	48	0	45	0.888889
late	Dumped tire	107	32	75	0.862903
late	Dumped tire	27	0	27	0.613636
late	Dumped tire	53	41	12	0.401515
late	Dumped tire	23	11	12	0.396552
late	Dumped tire	12	0	12	0.307692
late	Dumped tire	21	1	19	0.291667
late	Dumped tire	15	0	15	0.277778
late	Dumped tire	53	0	53	0.277487
late	Dumped tire	19	0	19	0.231707
late	Dumped tire	11	11	0	0.192982
late	Dumped tire	2	2	0	0.166667
late	Dumped tire	10	0	10	0.15873
late	Dumped tire	16	12	0	0.122137
late	Dumped tire	11	2	9	0.115789
late	Dumped tire	5	5	0	0.106383
late	Dumped tire	9	0	9	0.104651
late	Dumped tire	5	1	3	0.0980392
late	Dumped tire	9	7	2	0.0947368
late	Dumped tire	12	0	12	0.09375
late	Dumped tire	9	0	9	0.0891089
late	Dumped tire	9	2	7	0.0789474
late	Dumped tire	9	1	7	0.0559006
late	Dumped tire	4	0	4	0.0493827
late	Dumped tire	8	2	6	0.0479042
late	Dumped tire	1	0	1	0.011236
late	Dumped tire	1	0	1	0.010101
late	Trash can	30	26	2	0.625
late	Trash can	23	0	23	0.560976
late	Trash can	16	4	12	0.177778
late	Trash can	12	0	12	0.173913
late	Trash can	21	12	9	0.168
late	Trash can	14	14	0	0.14
late	Trash can	8	0	7	0.123077
late	Trash can	20	10	0	0.117647
late	Trash can	4	4	0	0.0888889
late	Trash can	6	1	5	0.0833333
late	Trash can	5	0	5	0.0625
late	Trash can	7	5	1	0.0518519
late	Trash can	4	0	4	0.0327869
late	Trash can	2	2	0	0.027027
late	Trash can	4	2	2	0.0147059
mid	Bucket	59	55	4	0.59
mid	Bucket	31	31	0	0.31
mid	Bucket	53	52	0	0.302857
mid	Bucket	23	0	23	0.2875
mid	Bucket	28	10	18	0.28
mid	Bucket	19	6	10	0.211111
mid	Bucket	12	0	11	0.12766
mid	Bucket	15	13	2	0.1
mid	Bucket	6	0	6	0.0555556
mid	Bucket	11	5	6	0.055
mid	Bucket	8	0	8	0.05
mid	Bucket	9	0	9	0.0273556
mid	Bucket	2	2	0	0.0266667
mid	Bucket	2	0	0	0.0206186
mid	Bucket	1	0	1	0.0133333
mid	Bucket	1	0	1	0.00970874
mid	Bucket	0	0	0	0
mid	Bucket	0	0	0	0
mid	Bucket	0	0	0	0
mid	Fence pole	45	0	45	1.8
mid	Fence pole	7	0	7	1
mid	Fence pole	26	0	26	0.619048
mid	Fence pole	20	2	14	0.526316
mid	Fence pole	15	0	15	0.241935
mid	Fence pole	8	0	8	0.16
mid	Fence pole	4	0	4	0.0851064
mid	Fence pole	7	0	7	0.0777778
mid	Fence pole	9	0	9	0.0391304
mid	Fence pole	2	0	2	0.0333333
mid	Fence pole	1	0	1	0.0322581
mid	Fence pole	1	0	1	0.03125
mid	Fence pole	5	0	5	0.0285714
mid	Fence pole	1	0	1	0.02
mid	Fence pole	1	0	1	0.0181818
mid	Fence pole	1	0	1	0
mid	Fence pole	0	0	0	0
mid	Fence pole	0	0	0	0
mid	Fence pole	0	0	0	0
mid	Fence pole	0	0	0	0
mid	Fence pole	0	0	0	0
mid	Fence pole	0	0	0	0
mid	Fence pole	0	0	0	0
mid	Fence pole	0	0	0	0
mid	Fence pole	0	0	0	0
mid	Discarded plastic	81	0	66	2.89286
mid	Discarded plastic	218	99	1	1.67692
mid	Discarded plastic	62	35	27	1.29167
mid	Discarded plastic	127	0	123	1.16514
mid	Discarded plastic	73	0	73	1.04286
mid	Discarded plastic	79	79	0	0.699115
mid	Discarded plastic	64	39	16	0.673684
mid	Discarded plastic	32	1	31	0.64
mid	Discarded plastic	23	0	7	0.605263
mid	Discarded plastic	53	2	51	0.481818
mid	Discarded plastic	99	32	67	0.44
mid	Discarded plastic	18	4	14	0.327273
mid	Discarded plastic	58	53	1	0.322222
mid	Discarded plastic	38	29	9	0.304
mid	Discarded plastic	50	16	33	0.285714
mid	Discarded plastic	24	6	18	0.252632
mid	Discarded plastic	24	0	24	0.244898
mid	Discarded plastic	42	0	42	0.24
mid	Discarded plastic	37	16	21	0.185
mid	Discarded plastic	38	0	38	0.181818
mid	Discarded plastic	8	0	5	0.16
mid	Discarded plastic	6	0	6	0.146341
mid	Discarded plastic	14	0	13	0.145833
mid	Discarded plastic	20	14	5	0.133333
mid	Discarded plastic	16	0	16	0.128
mid	Discarded plastic	4	0	4	0.105263
mid	Discarded plastic	3	0	3	0.09375
mid	Discarded plastic	9	0	9	0.075
mid	Discarded plastic	3	0	3	0.0652174
mid	Discarded plastic	13	9	2	0.065
mid	Discarded plastic	8	0	6	0.0592593
mid	Discarded plastic	8	0	8	0.0533333
mid	Discarded plastic	11	2	1	0.044
mid	Discarded plastic	6	0	6	0.0255319
mid	Discarded plastic	3	1	2	0.025
mid	Discarded plastic	2	0	2	0.0162602
mid	Discarded plastic	4	3	1	0.016
mid	Discarded plastic	4	3	0	0.0145455
mid	Discarded plastic	5	5	0	0.013587
mid	Discarded plastic	1	0	1	0.01
mid	Discarded plastic	1	1	0	0.00869565
mid	Discarded plastic	1	0	1	0.004
mid	Discarded plastic	0	0	0	0
mid	Discarded plastic	0	0	0	0
mid	Discarded plastic	0	0	0	0
mid	Discarded plastic	0	0	0	0
mid	Discarded styrofoam	36	0	27	2.25
mid	Discarded styrofoam	40	0	40	2.22222
mid	Discarded styrofoam	71	41	30	1.57778
mid	Discarded styrofoam	37	0	37	1.23333
mid	Discarded styrofoam	36	0	34	0.878049
mid	Discarded styrofoam	35	0	35	0.514706
mid	Discarded styrofoam	28	0	23	0.35
mid	Discarded styrofoam	27	0	27	0.252336
mid	Discarded styrofoam	10	0	9	0.2
mid	Discarded styrofoam	19	0	19	0.153226
mid	Discarded styrofoam	15	0	15	0.12
mid	Discarded styrofoam	0	0	0	0
mid	Dumped tire	107	52	6	1.57353
mid	Dumped tire	11	0	11	1.375
mid	Dumped tire	392	14	86	1.12
mid	Dumped tire	20	0	20	1
mid	Dumped tire	24	6	18	0.888889
mid	Dumped tire	107	0	100	0.829457
mid	Dumped tire	69	1	68	0.69
mid	Dumped tire	92	0	86	0.681481
mid	Dumped tire	37	29	6	0.660714
mid	Dumped tire	33	28	3	0.622642
mid	Dumped tire	46	10	17	0.613333
mid	Dumped tire	76	0	72	0.475
mid	Dumped tire	69	0	69	0.46
mid	Dumped tire	43	36	7	0.452632
mid	Dumped tire	22	14	8	0.44
mid	Dumped tire	70	1	69	0.4
mid	Dumped tire	54	51	2	0.36
mid	Dumped tire	81	0	59	0.36
mid	Dumped tire	89	16	72	0.330855
mid	Dumped tire	34	0	33	0.272
mid	Dumped tire	20	1	19	0.266667
mid	Dumped tire	38	0	27	0.262069
mid	Dumped tire	21	0	20	0.247059
mid	Dumped tire	22	3	19	0.22
mid	Dumped tire	21	0	17	0.21
mid	Dumped tire	23	1	22	0.166667
mid	Dumped tire	13	0	13	0.1625
mid	Dumped tire	28	3	25	0.16
mid	Dumped tire	22	22	0	0.146667
mid	Dumped tire	34	0	31	0.136
mid	Dumped tire	4	0	3	0.133333
mid	Dumped tire	10	0	8	0.128205
mid	Dumped tire	11	0	11	0.123596
mid	Dumped tire	3	0	3	0.12
mid	Dumped tire	15	0	15	0.107143
mid	Dumped tire	26	3	14	0.1
mid	Dumped tire	25	0	25	0.0909091
mid	Dumped tire	11	1	10	0.0846154
mid	Dumped tire	12	5	7	0.08
mid	Dumped tire	2	1	0	0.0666667
mid	Dumped tire	10	0	10	0.0571429
mid	Dumped tire	14	0	13	0.0518519
mid	Dumped tire	6	0	6	0.05
mid	Dumped tire	4	2	2	0.0444444
mid	Dumped tire	6	0	4	0.0428571
mid	Dumped tire	5	4	0	0.0357143
mid	Dumped tire	2	0	1	0.0322581
mid	Dumped tire	3	1	2	0.03
mid	Dumped tire	7	3	4	0.028
mid	Dumped tire	2	0	1	0.0266667
mid	Dumped tire	5	0	5	0.0217391
mid	Dumped tire	2	0	2	0.00790514
mid	Dumped tire	2	0	2	0.00784314
mid	Dumped tire	1	0	1	0.00680272
mid	Dumped tire	0	0	0	0
mid	Dumped tire	0	0	0	0
mid	Dumped tire	0	0	0	0
mid	Dumped tire	0	0	0	0
mid	Dumped tire	0	0	0	0
mid	Trash can	205	53	19	0.770677
mid	Trash can	36	36	0	0.72
mid	Trash can	39	36	3	0.557143
mid	Trash can	67	67	0	0.536
mid	Trash can	11	0	9	0.244444
mid	Trash can	14	11	0	0.121739
mid	Trash can	7	4	3	0.0958904
mid	Trash can	25	22	3	0.0909091
mid	Trash can	8	6	1	0.0888889
mid	Trash can	21	21	0	0.084
mid	Trash can	17	4	11	0.0755556
mid	Trash can	8	0	8	0.0567376
mid	Trash can	8	0	8	0.032
mid	Trash can	3	0	1	0.03
mid	Trash can	5	5	0	0.0227273
mid	Trash can	1	0	1	0.01
mid	Trash can	2	1	1	0.00740741
mid	Trash can	1	0	1	0.00373134
