# Supplementary material for: Condition-Specific Competitive Effects of the Invasive Mosquito <em>Aedes albopictus</em> on the Resident <em>Culex pipiens</em> Among Different Urban Container Habitats May Explain Their Coexistence in the Field
Source: Preprints.org preprint supplement (doi:10.20944/preprints202110.0014.v1), 2021-10-01
Supplement: Supplementary file 3 [file Dataset S2. Nutrient analyses.xlsx]

## Sheet: Nutrient analyses
Container type	Container	Replicate	Nitrate (mg/L)	Ammonia (mg/L)	Phosphate (mg/L)
Functional	Fence pole	1	2	0	5
Functional	Fence pole	2	1	0	5
Functional	Fence pole	3	0	0.25	5
Functional	Fence pole	4	2	0.25	15
Functional	Trash can	1	50	6	15
Functional	Trash can	2	50	3	15
Functional	Trash can	3	20	3	5
Functional	Trash can	4	20	1	5
Functional	Bucket	1	2	0.5	5
Functional	Bucket	2	20	3	15
Functional	Bucket	3	10	1	5
Functional	Bucket	4	5	1	0
Trash	Plastic Trash	1	0	0	5
Trash	Plastic Trash	2	1	0	5
Trash	Plastic Trash	3	5	0.25	5
Trash	Plastic Trash	4	2	0.25	5
Trash	Dumped Tire	1	0	0.25	5
Trash	Dumped Tire	2	2	0	5
Trash	Dumped Tire	3	5	0.25	15
Trash	Dumped Tire	4	10	0.5	5
Trash	Styrofoam	1	1	0	5
Trash	Styrofoam	2	1	0	5
Trash	Styrofoam	3	2	0.25	15
Trash	Styrofoam	4	2	0.5	5

## Sheet: AquaCheck Strip tests
Nitrate Spectrophotometer (mg/L)	Nitrate Test Strip (mg/L)	Ammonia Spectrophotometer (mg/L)	Ammonia Test Strip (mg/L)	Phosphate Spectrophotometer (mg/L)	Phosphate Test Strip (mg/L)
6.7	0	8.57	6	74.7	50
25.7	2	2	0.25	73.3	50
46.79	20	0.05	0.25	54.3	50
32.4	20	4.95	3	45.2	30
45.3	20	3.15	1	40.2	50
25.9	20	0.768	0.25	32.1	50
24.1	1	0.435	0.25	30.6	50
15.7	2	4.43	1	30.4	50
49.4	20	0.062	0	28.8	50
	50	6.78	3	26.1	50
17.2	0	0.499	0.5	25	50
76.8	50	4.46	1	23.8	50
59.22	20	0.797	0.25	22.6	50
11.7	2	1.91	0.5	20.1	15
2.41	0	1.27	0.25	18	50
5.3	1	0.179	0.25	17.3	30
23.2	10	1.75	0.5	17.1	30
4.71	0	2.36	1	13.6	30
5.21	0	2.57	0.5	11.5	15
48.2	10	1.33	1	11.4	15
19.9	2	0.648	0.5	11.4	30
23.9	5	4.38	1	11.2	30
44.71	20	0.399	0.25	9.19	15
8.7	0	4.67	0.5	9	5
12.29	5	1.99	0.25	8.33	5
28.46	10	0.715	0.25	8.08	15
15.7	0	2.62	0.5	7.81	30
3.74	1			7.48	15
39.9	20	2.82	0.25	7.4	15
17.22	20	0.806	0.25	7.04	5
3.8	0	9.61	6	6.39	15
9.81	0		0.5	6.12	5
15.8	2	0.666	0.5	5.76	5
6.2	0	0.093	0	5.38	15
48.7	10	2.73	1	5.34	5
26.9	2	1.98	1	5.33	15
50.8	10	0.81	0.5	5.01	5
1.55	0	0.118	0	5	5
8.45	1	0.042	0	4.92	30
20.1	0	0.223	0.25	4.74	5
20.8	10	1.86	0.5	4.6	15
5.86	0	1.57	1	3.53	5
1.37	0	0.232	0.5	3.4	15
37.13	20	0.854	0.5	3.34	5
1.66	0	6.81	3	3.25	5
2.9	0	0.079	0	2.98	15
17.4	20	0.448	0.25	2.73	50
3.25	1	0.487	0.25	2.63	5
32	20	0.048	0	2.61	5
2.75	0	1.75	1	2.46	5
109	50	5.58	3	2.44	5
4.16	0	0.546	0.5	2.39	5
0.991	1	0.44	0.5	2.39	5
4.34	1	0.817	0.5	2.28	5
1.24	0	0.038	0	2.24	15
10.2	0	0.465	0.5	2.1	5
7.28	0		0.25	2.03	5
11.6	1	0.805	0.5	1.77	15
3.52	0	1.04	0.25	1.72	15
13.2	2	0.061	0	1.63	15
3.37	0	1.51	1	1.54	15
4.22	0	1.57	0.5	1.51	5
5.12	0	1.47	1	1.4	5
3.99	0	0.053	0	1.29	5
5.92	0	0.34	0.25	1.15	5
1.54	0	3.49	0.5	0.819	5
3.11	1	0.292	0.5	0.728	5
3.46	0	0.6	0.5	0.708	15
1.19	0	0.225	0.25	0.691	5
1.54	0	0.479	0.25	0.625	5
3.96	1	0.71	0.5	0.601	5
0.847	0	0.112	0	0.522	5
0.877	0	0.612	0.5	0.516	5
1.44	0	1.26	1	0.499	5
13.9	5	0.101	0.25	0.475	15
12	1	0.201	0.25	0.445	5
9.2	1	1.84	1	0.392	5
1.96	0	0.431	0.5	0.356	5
2.13	0	0.065	0	0.341	5
1.92	0	0.114	0.25	0.338	5
2.15	0	0.08	0	0.333	5
0.944	0	0.209	0.25	0.323	5
9.4	0	0.852	0.5	0.288	5
20	5	0.006	0	0.241	5
2.03	0	1.57	0.5	0.221	5
0.383	0	4.29	1	0.214	5
0.013	0	0.066	0.25	0.195	5
10.34	0	2.25	0.5	0.153	5
2.73	0	0.144	0.25	0.13	5
0.728	0	0.165	0.25	0.091	5
75.1	50	0.022	0	0.067	5
2.92	1	0.049	0.25	0.058	5
11.3	2	4.09	1	0.046	5
5.89	0	0.115	0.25	0.004	5
15.1	10	5.22	1		30
14.7	0	1.18	1		15
11.5	1	0.755	1		15
11.1	1	0.447	0.25		5
39.7	5
6.99	0
