# Supplementary material for: Condition-Specific Competitive Effects of the Invasive Mosquito <em>Aedes albopictus</em> on the Resident <em>Culex pipiens</em> Among Different Urban Container Habitats May Explain Their Coexistence in the Field
Source: Preprints.org preprint supplement (doi:10.20944/preprints202110.0014.v1), 2021-10-01
Supplement: Supplementary file 4 [file Dataset S3. Competition trial.xlsx]

## Sheet: Competition trial
Container type	Treatment	Replicate	Survivorship	Mean instar
Bucket	C	1	0.2	2
Bucket	I	1	0.133333	1
Bucket	R	1	0.4	2
Bucket	I	2	0.0666667	1
Bucket	R	2	0.333333	1.6
Bucket	C	3	0
Bucket	I	3	0.0666667	1
Bucket	R	3	0.133333	2.5
Bucket	C	4	0.2	1
Bucket	I	4	0.0666667	1
Bucket	R	4	0.2	1.66667
Fence pole	C	5	0
Fence pole	I	5	0.0666667	1
Fence pole	R	5	0
Fence pole	C	6	0.0666667	1
Fence pole	I	6	0.0666667	1
Fence pole	R	6	0
Fence pole	C	7	0
Fence pole	I	7	0
Fence pole	R	7	0.0666667	1
Fence pole	C	8	0.0666667	1
Fence pole	I	8	0
Fence pole	R	8	0.0666667	1
Discarded plastic	C	9	0.266667	3
Discarded plastic	I	9	0.133333	1
Discarded plastic	R	9	0.466667	2.57143
Discarded plastic	C	10	0.266667	1.25
Discarded plastic	I	10	0.2	1
Discarded plastic	C	11	0.266667	1.5
Discarded plastic	I	11	0.2	1.33333
Discarded plastic	R	11	0.4	2.16667
Discarded plastic	C	12	0.266667	1.5
Discarded plastic	I	12	0.2	1.33333
Discarded plastic	R	12	0.866667	2.38462
Discarded styrofoam	C	13	0.4	1.16667
Discarded styrofoam	I	13	0.0666667	2
Discarded styrofoam	R	13	0.333333	2.4
Discarded styrofoam	C	14	0.333333	1.2
Discarded styrofoam	I	14	0.2	1.66667
Discarded styrofoam	R	14	0.533333	3.375
Discarded styrofoam	C	15	0.133333	2
Discarded styrofoam	I	15	0
Discarded styrofoam	R	15	0.466667	3.28571
Discarded styrofoam	C	16	0.133333	2
Discarded styrofoam	I	16	0.0666667	2
Discarded styrofoam	R	16	0.266667	2.75
Dumped tire	C	17	0.0666667	1
Dumped tire	I	17	0
Dumped tire	R	17	0.266667	2
Dumped tire	C	18	0.133333	1
Dumped tire	I	18	0.0666667	1
Dumped tire	R	18	0.4	1.16667
Dumped tire	C	19	0.2	1
Dumped tire	I	19	0
Dumped tire	R	19	0.333333	1.8
Dumped tire	C	20	0.2	1
Dumped tire	R	20	0.333333	1.2
Trash can	C	21	0.533333	3.875
Trash can	I	21	0.533333	5
Trash can	R	21	0.6	4.44444
Trash can	C	22	0.4	4.66667
Trash can	I	22	0.8	4.58333
Trash can	R	22	0.533333	4.75
Trash can	C	23	0.466667	3.71429
Trash can	I	23	0.4	5
Trash can	R	23	0.533333	4.625
Trash can	C	24	0.4	4.66667
Trash can	I	24	0.733333	4.54545
Trash can	R	24	0.466667	4.85714
